# Supplementary material for: Regulation of Grain Chalkiness and Starch Metabolism by FLO2 Interaction Factor 3, a bHLH Transcription Factor in Oryza sativa
Source: MDPI journal article supplement (doi:10.3390/ijms241612778), 2023-08-14
Supplement: s1 [file s1]

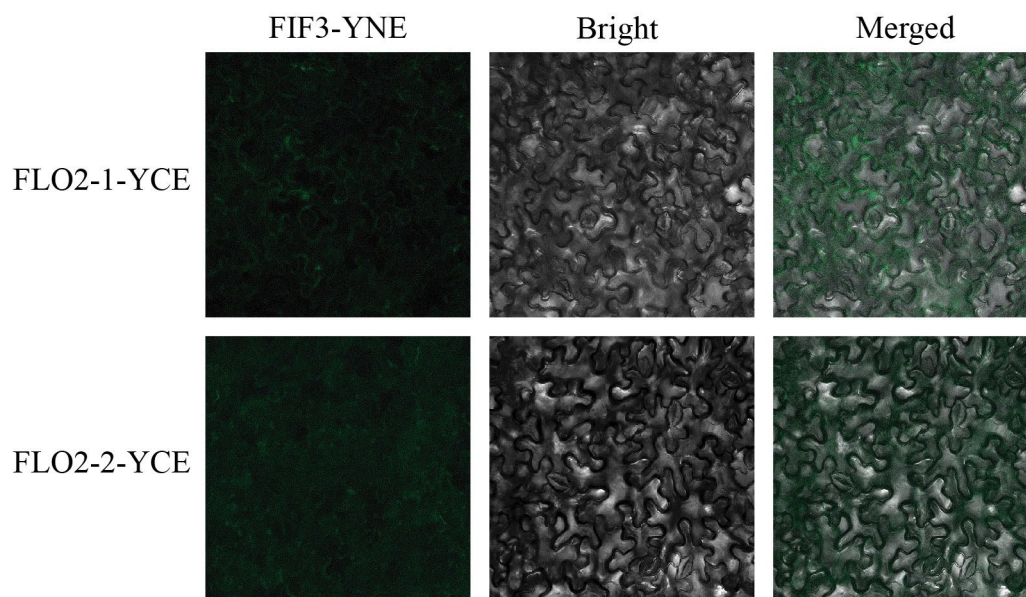

**Supplementary Figure S1.** BiFC result of OsFIF3 with FLO2. OsFIF3 can interact with longer FLO2-1 variant, but it is difficult to interact with shorter FLO2-2 variant.

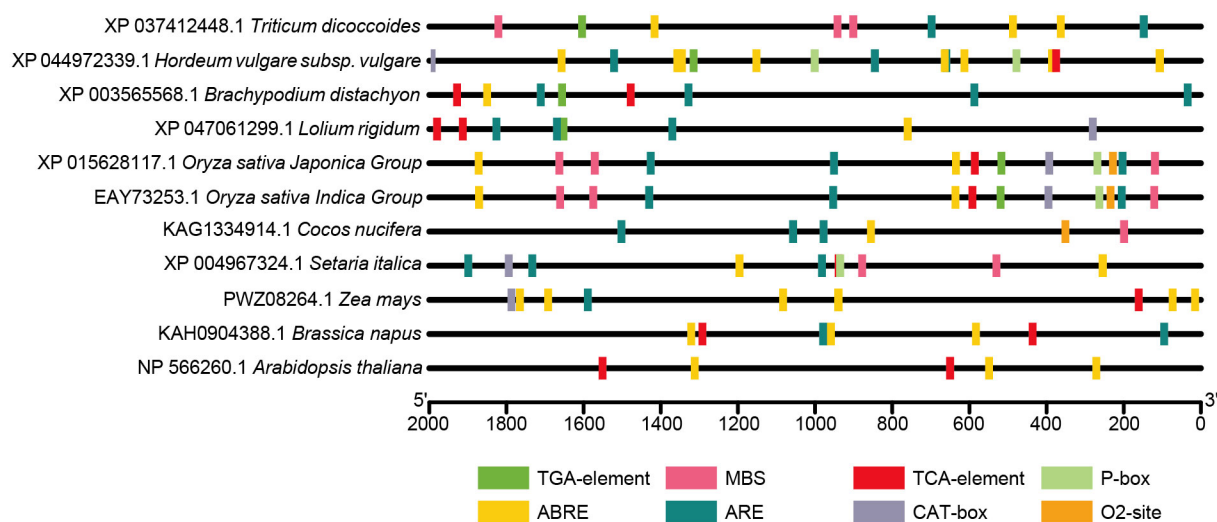

**Supplementary Figure S2.** Promoter alignment of OsFIF3 homologues from *O. sativa Indica*, *B. distachyon*, *T. dicoccoides*, *H. vulgare subsp. vulgare*, *L. rigidum*, *S. italica*, *C. nucifera*, *Z. mays*, *B. napus* and *A. thaliana*.

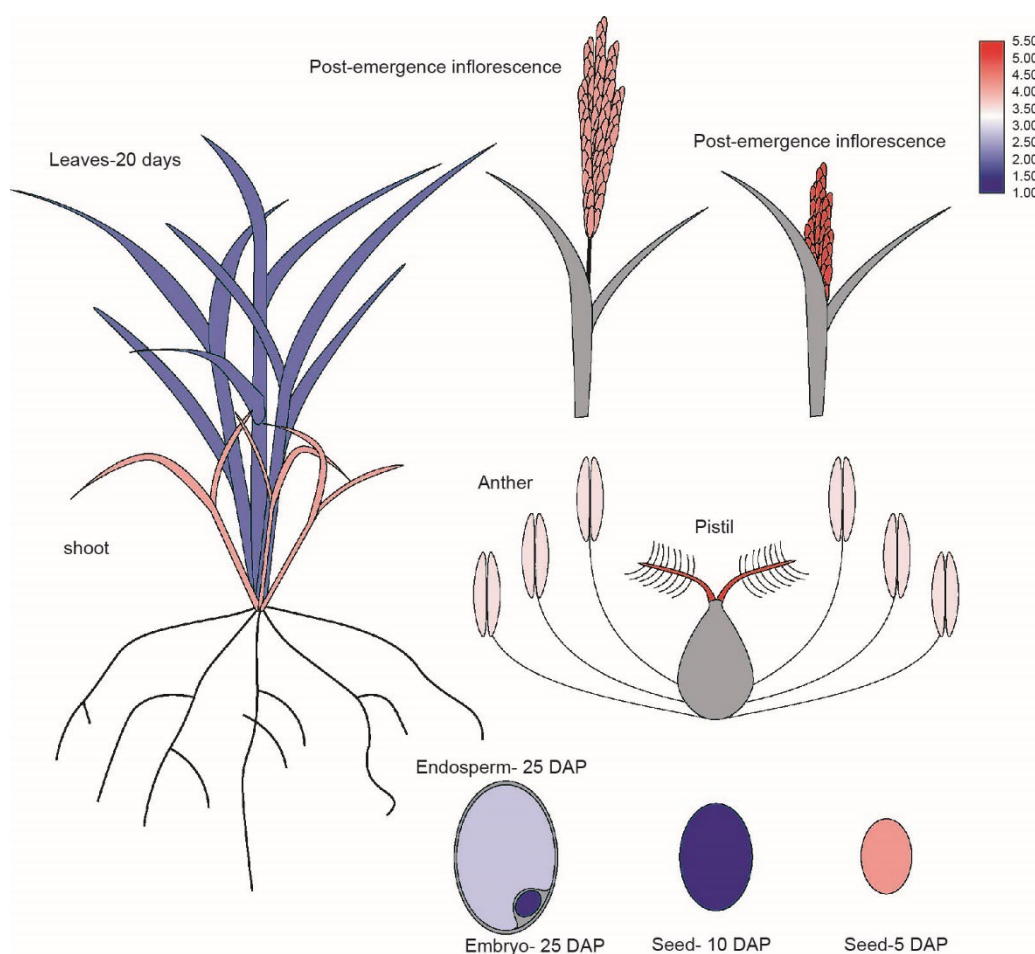

**Supplementary Figure S3.** Expression Patterns of *OsFIF3*. The eFP browser displays the expression pattern of *OsFIF3*, including shoots, leaves-20 days, post-emergence inflorescence, pre-emergence inflorescence, anther, pistil, seed-5 DAP, seed- 10 DAP, endosperm- 25 DAP, embryo- 25 DAP. The expression level is quantified by Log2. *OsFIF3* expression is concentrated in shoots, post-emergence inflorescence, pre-emergence inflorescence, pistil and seed-5 DAP. This data is sourced from the Rice Genome Annotation Project, which can be found below this page ([http://rice.uga.edu/cgi-bin/ORF\\_infopage.cgi?orf=LOC\\_Os01g14110](http://rice.uga.edu/cgi-bin/ORF_infopage.cgi?orf=LOC_Os01g14110)). Expression level is RNA-Seq FPKM [12].

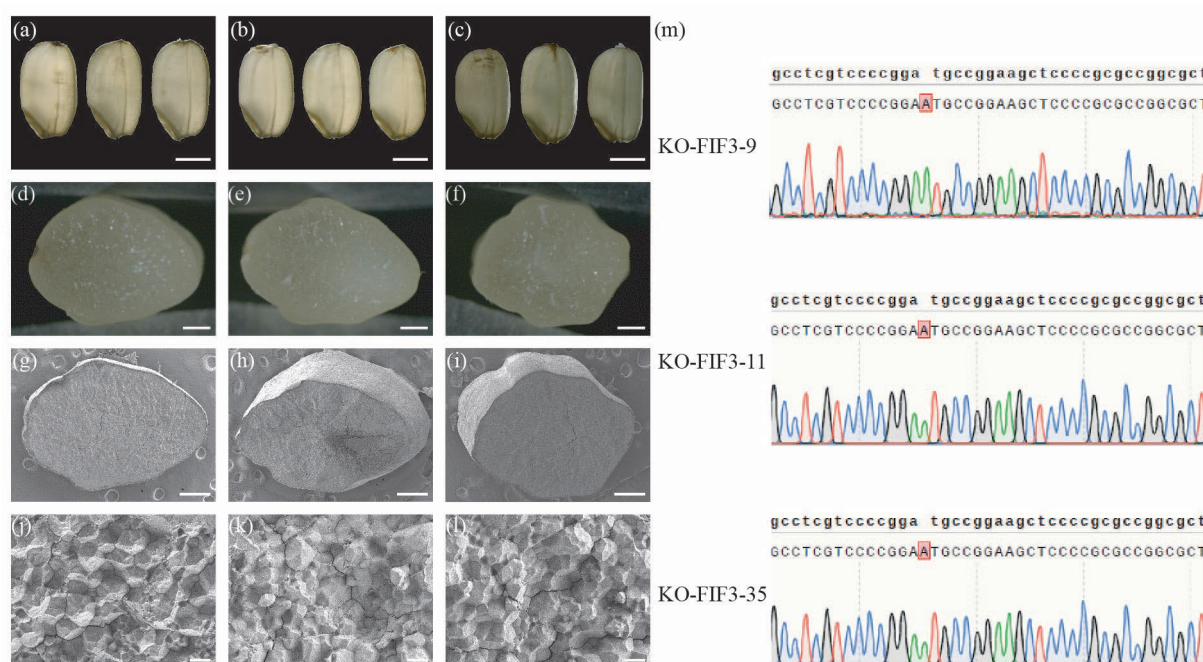

**Supplementary Figure S4.** Grain phenotype of *OsFIF3* knockout mutants. Grains of (a) *KO-FIF3-9*, (b) *KO-FIF3-11*, (c) *KO-FIF3-35* mutant under backlight conditions. Bar = 2 mm. Sectioned grains of (d) *KO-FIF3-9*, (e) *KO-FIF3-11*, (f) *KO-FIF3-35* mutant. Bar = 500  $\mu$ m. Cross section of (g, j) *KO-FIF3-9*, (h, k) *KO-FIF3-11*, (i, l) *KO-FIF3-35* mutant grains under scanning electron microscopy. (g, h, i) Bar = 500  $\mu$ m and (j, k, l) Bar = 15  $\mu$ m. (m) Editing site of *KO-FIF3-9*, *KO-FIF3-11*, *KO-FIF3-35* sequence. One nucleotide (A) was inserted at the 522 of *OsFIF3*, causing frameshift in *fif3* mutants.

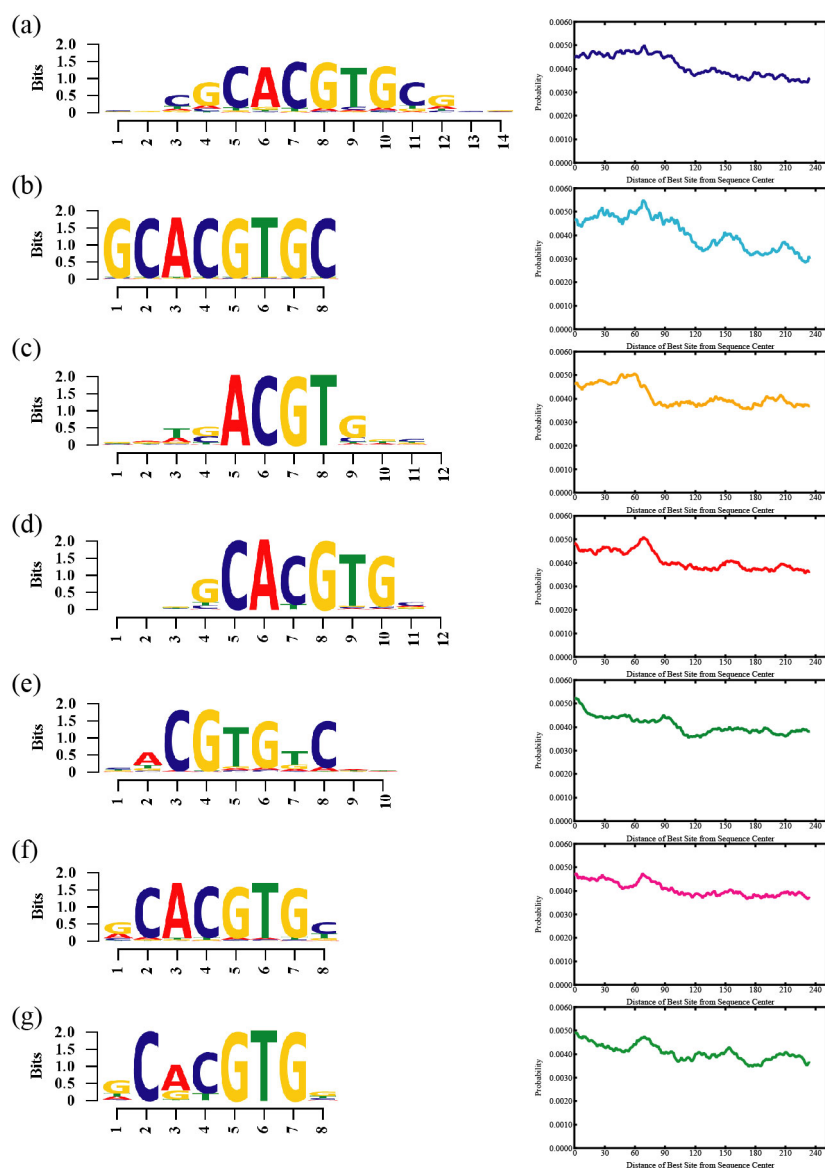

**Supplementary Figure S5.** CentriMo results of filtered DAP-Seq data (Site fold enrichment>13). Motifs of (a) bHLH145, (b) bHLH78, (c) HYH, (d) HBI1, (e) ABF3, (f) bHLH3 and (g) bHLH34 that had the similar CACGTG binding motifs were enriched in binding site.



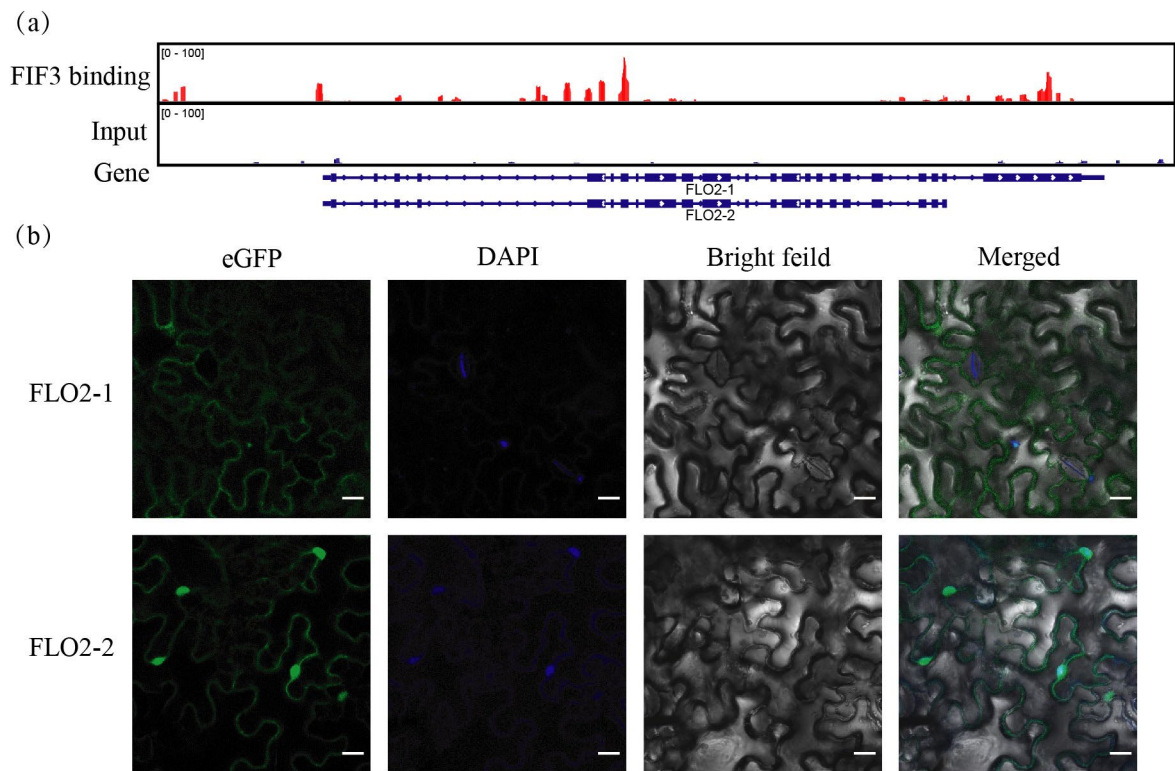

**Supplementary Figure S6.** DAP-seq of OsFIF3 and subcellular localization of OsFLO2. (a) A certain enrichment of OsFIF3 at the last exon of *FLO2* in DAP-seq. The structure of the exon was different between the two transcripts of *FLO2*. *FLO2-1* is a transcript variant containing the last exon in *FLO2*, whereas *FLO2-2* loses the last exon compared with *FLO2-1*. (b) The subcellular localization of the two *FLO2* variants. The shorter variant *FLO2-2* had more nuclear localization signals. Bar = 10  $\mu$ m.

**Supplementary Table S1.** Statistical table of Dap-seq original data and quality control data.

|                          | Input_original | Input_clean | OsFIF3_original | OsFIF3_clean |
|--------------------------|----------------|-------------|-----------------|--------------|
| Total Reads Count        | 24757336       | 22348416    | 21059742        | 20158164     |
| Total Bases Count(bp)    | 3713600400     | 3324338832  | 3158961300      | 2957654918   |
| Average Read Length (bp) | 150            | 149         | 150             | 147          |
| Q20 Bases Count (bp)     | 3629094088     | 3242148675  | 3075948728      | 2877564327   |
| Q20 Bases Ratio (%)      | 97.72%         | 97.53%      | 97.37%          | 97.29%       |
| Q30 Bases Count (bp)     | 3463524173     | 3084429315  | 2917864991      | 2726350220   |
| Q30 Bases Ratio (%)      | 93.27%         | 92.78%      | 92.37%          | 92.18%       |
| GC content (%)           | 50.36%         | 50.30%      | 54.86%          | 54.87%       |

- Supplementary S1.** GO enrichment standard.
- Supplementary S2.** KEGG enrichment standard.
- Supplementary S3.** Bed file of FIF3 binding sites. Headers for each column are chromosome, start, end, name and fold enrichment, respectively.
- Supplementary S4.** CentriMo result of FIF3 binding sites.
